# Supplementary material
Source: PubMed Central journal article supplement (PMC5296254)
Supplement: NIHMS839077-supplement-1.pdf [file NIHMS839077-supplement-1.pdf]

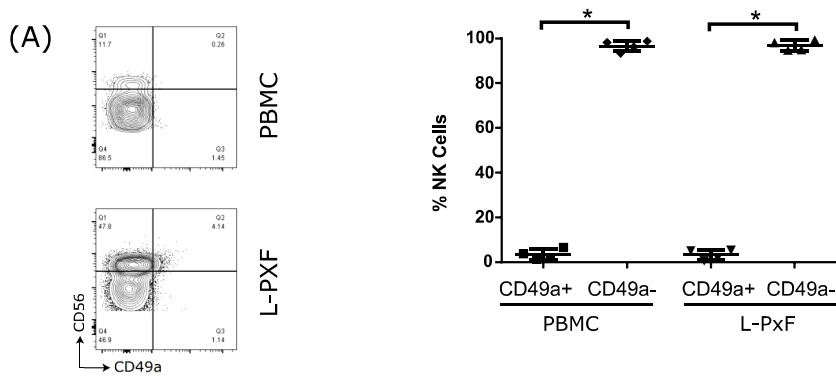

### Supplemental Figure 1

(A) Human liver does not contain CD49a<sup>+</sup> cells. Representative expression of CD49a and CD56 on isolated single cell viable CD3<sup>-</sup>, CD19<sup>-</sup>, lymphocytes from four healthy liver samples from venous blood (PBMC) or liver post-excision flush (L-PxF). (B) Summary of data for CD49a expression visualized by summing gates Q1 and Q4 vs Q2 and Q3. \* = p<0.05, Student t test.

**Supplemental Table 1**

CyTOF panel of monoclonal antibodies and isotopes used for labeling.

| <b>Antigen</b> | <b>Clone</b> | <b>Tag</b>   |
|----------------|--------------|--------------|
| CD45           | HI30         | 89 Y         |
| Barcoding      |              | 102 - 110 Pd |
| KIR2DL4        | 181703       | 141 Pr       |
| CD19           | HIB19        | 142 Nd       |
| KIR3DS1/L1     | Z27          | 143 Nd       |
| CD3            | UCHT1        | 144 Nd       |
| KIR2DS4        | FES172       | 145 Nd       |
| KIR2DL1/DS1    | EB6B         | 146 Nd       |
| NKG2D          | 1D11         | 147 Sm       |
| KIR2DL2/2DL3   | CH-L         | 148 Nd       |
| CD127          | A019D5       | 149 Sm       |
| TNF-a          | Mab11        | 152 Sm       |
| CS62L          | DREG-56      | 153 Eu       |
| KIR2DL5        | UP-R1        | 154 Sm       |
| CD27           | L128         | 155 Gd       |
| KIR3DL1        | DX9          | 156 Gd       |
| NKG2C          | 134591       | 159 Tb       |
| CD69           | FN50         | 160 Gd       |
| NKp30          | P30-15       | 161 Dy       |
| CD94           | DX22         | 163 Dy       |
| CD49e          | IIA1         | 164 Dy       |
| CD16           | 3G8          | 165 Ho       |
| NKG2A          | Z199         | 166 Er       |
| NKp44          | P44-8        | 167 Er       |
| IFN-g          | B27          | 168 Er       |
| CD25           | 2A3          | 169 Tm       |
| NKp80          | 239127       | 170 Er       |
| CD57           | HCD57        | 172 Yb       |
| NKp46          | 195314       | 174 Yb       |
| CD56           | NCAM16.2     | 176 Yb       |
| DNA            |              | 191/193 Ir   |
| Cisplatin      |              | 194/195 Pt   |
| CD11b          | ICRF44       | 209 Bi       |
